1 **Approximation of bolus arrival time by integrating MR arterial spin labeling and**  
2 **SPECT: theory and clinical application**

3

4 Kazumasa Otomo, MD<sup>1</sup> Shinichiro Sugiyama, MD, PhD<sup>2,3</sup> Hideki Ota, MD, PhD<sup>4</sup> Hiroyuki  
5 Sakata, MD, PhD<sup>5</sup> Hidenori Endo, MD, PhD<sup>3</sup>

6

7 <sup>1</sup>Division of Radiology, Kohnan Hospital, Sendai, Japan

8 <sup>2</sup>Department of Neuroanesthesia, Kohnan Hospital, Sendai, Japan

9 <sup>3</sup>Department of Neurosurgery, Tohoku University Graduate School of Medicine, Sendai,  
10 Japan

11 <sup>4</sup>Department of Diagnostic Radiology, Tohoku University Hospital, Sendai, Japan

12 <sup>5</sup>Department of Neuroendovascular Therapy, Kohnan Hospital, Sendai, Japan

13

14 **Short title:** BAT approximated using ASL/SPECT ratio

15

16 **Corresponding author:**

17 Shinichiro Sugiyama, MD, PhD

18 Department of Neuroanesthesia, Konhan Hospital

19 4-20-1 Nagamachi-minami, Taihaku-ku, Sendai, Miyagi 982-8523, Japan

20 E-mail: [sugiyama@nsg.med.tohoku.ac.jp](mailto:sugiyama@nsg.med.tohoku.ac.jp); Phone: +81-22-248-2131; Fax: +81-22-248-1644

21

22 **Total word count:** 3113

23

24 **Abstract**

25 *Background*

26 Magnetic resonance arterial spin labeling (ASL) imaging with multiple post-labeling delays  
27 (PLDs) provides the bolus arrival time (BAT) as well as cerebral blood flow (CBF) to  
28 characterize the cerebral hemodynamics. However, the complexity of data acquisition and  
29 preprocessing inhibits the calculation of BAT. We developed a simple method for approximating  
30 BAT using single-PLD ASL imaging and single-photon emission computed tomography  
31 (SPECT). We conducted a proof-of-concept study in patients with carotid artery stenosis.

32 *Methods*

33 We introduced the ASL/SPECT ratio, calculated by dividing the tissue magnetization in  
34 pulsed continuous ASL by the CBF measured using SPECT. In theory, the ASL/SPECT ratio  
35 has a positive relationship with BAT. Our proof-of-concept study included 63 patients who  
36 underwent carotid endarterectomy (CEA) in our hospital from 2014 to 2019. After  
37 preprocessing the ASL and SPECT datasets using three-dimensional stereotactic surface  
38 projection, we calculated the ASL/SPECT ratio at each voxel. We investigated the correlation  
39 between the preoperative BAT and the postoperative CBF.

40 *Results*

41 We found a positive correlation between the delay of BAT and the increase rate of CBF in the  
42 ipsilateral middle cerebral artery territory (Pearson's correlation coefficient, 0.444; 95%  
43 confidence interval, 0.220–0.623;  $p=0.000269$ ). Four patients (6.3%) presented with  
44 hyper-perfusion phenomenon. Visualization of the BAT revealed that the area prone to  
45 postoperative hyper-perfusion presented with a delayed preoperative BAT.

46 *Conclusions*

47 Our findings suggest the feasibility of the BAT approximated using ASL and SPECT in  
48 patients with chronic steno-occlusive cerebrovascular diseases. The proposed concept is also

49 applicable to ASL and any modalities that measure CBF.

50

51 **Non-standard Abbreviations and Acronyms**

52 ASL: arterial spin labeling; BAT: bolus arrival time; CBF: cerebral blood flow; CEA: carotid

53 endarterectomy; ICA: internal carotid artery; MCA: middle cerebral artery; MR: magnetic

54 resonance; pCASL: pulsed continuous ASL; PLD: post-labeling delay; ROI: region of interest;

55 SPECT: single-photon emission computed tomography

56

57

## 58 **Introduction**

59 Arterial spin labeling (ASL) is a noninvasive magnetic resonance (MR) technique used  
60 to examine cerebral hemodynamics (1). ASL datasets obtained at multiple post-labeling delays  
61 (PLDs) enabled us to assess not only cerebral blood flow (CBF) but also bolus arrival time  
62 (BAT) (2-4). The BAT is defined as the time required for labeled spins to reach the target  
63 tissues. Several previous studies reported the ability of BAT to characterize ischemic status in  
64 patients with steno-occlusive cerebrovascular diseases, such as acute stroke, chronic internal  
65 carotid artery (ICA) occlusion, or Moyamoya disease (4–7). However, the complexity of data  
66 processing accompanied with multi-PLD ASL imaging has reduced the feasibility of BAT in  
67 the neuroradiological field.

68 We developed a simple method for approximating BAT by integrating a single-PLD  
69 ASL imaging and other medical modalities that measure cerebral blood flow (CBF). In this  
70 study, we used single-photon emission computed tomography (SPECT) for measuring the CBF.  
71 We propose a theory in which we convert the difference in ASL signal intensity between two  
72 regions of interest (ROIs) into a difference in BAT by mathematical integration of ASL and  
73 SPECT datasets. In addition, we conducted a proof-of-concept study, in which we applied the  
74 proposed method to the hemodynamic assessment of patients with ICA stenosis.

75

## 76 **Methods**

### 77 *Introduction of the ASL/SPECT ratio*

78 Based on the single-compartment theory, the difference in tissue magnetization  
79 ( $\Delta M(t)$ ) between the control and labeled images in three-dimensional (3D) pulsed continuous  
80 ASL (pCASL) imaging is described using Eqs. (1)–(3) (8-11):

$$81 \quad \frac{\Delta M(t)}{M_0} = 2f\varepsilon T_{1app} \cdot e^{-\left(\frac{BAT}{T_{1a}}\right)} \cdot \left(1 - e^{-\left(\frac{t-BAT}{T_{1app}}\right)}\right) \quad (BAT \leq t \leq BAT + LT) \quad (1)$$

$$82 \quad \frac{\Delta M(t)}{M_0} = 2f\varepsilon T_{1app} \cdot e^{-\left(\frac{BAT}{T_{1a}}\right)} \cdot e^{-\left(\frac{t-BAT}{T_{1app}}\right)} \cdot \left( e^{\frac{LT}{T_{1app}}} - 1 \right) \quad (BAT + LT < t) \quad (2)$$

$$83 \quad \frac{1}{T_{1app}} = \frac{1}{T_{1e}} + \frac{f}{\lambda} \quad (3)$$

84 where  $f$  is blood flow,  $\varepsilon$  is inversion efficacy of labeling pulse,  $BAT$  is bolus arrival time  
 85 from labeling plane to image slice,  $LT$  is labeling time,  $T_{1a}$  is longitudinal relaxation time of  
 86 water in blood,  $T_{1e}$  is longitudinal relaxation time of water in tissue, and  $\lambda$  is tissue blood  
 87 partition coefficient of water. A fully relaxed blood spin ( $M_0$ ) is typically used for the local  
 88 signal intensity of proton density images. In Figure 1, we demonstrate the tissue magnetization  
 89 ( $\Delta M(t)$ ) with time after the start of labeling based on Eqs. (1)–(3).

90 Let  $P_k(a_k, b_k, c_k)$  mean that a certain point  $P_k$  ( $k = 0, 1, 2, \dots, N$ ) in brain tissue has  
 91  $\Delta M(t)/M_0 = a_k$  and  $BAT = b_k$  in the pCASL imaging, and  $f = c_k$  in SPECT. Here, we  
 92 define the ASL/SPECT ratio ( $\gamma_k$ ) using Eq. (4):

$$93 \quad \gamma_k = \frac{a_k}{c_k} \quad (4)$$

94 Now we consider two points:  $P_k(a_k, b_k, c_k)$  and  $P_l(a_l, b_l, c_l)$  ( $k, l = 1, 2, \dots, N$ ).

95 The difference in the BAT between the two points ( $\Delta$ ) is obtained using Eq. (5):

$$96 \quad \Delta = b_l - b_k \quad (5)$$

97 Under the condition that  $t = PLD > BAT + LT$ , we obtained Eqs.(6) and (7) using Eq. (2):

$$98 \quad \gamma_k = \frac{a_k}{c_k} = 2\varepsilon T_{1app} \cdot e^{-\left(\frac{b_k}{T_{1a}}\right)} \cdot e^{-\left(\frac{t-b_k}{T_{1app}}\right)} \cdot \left( e^{\frac{LT}{T_{1app}}} - 1 \right) \quad (6)$$

$$99 \quad \gamma_l = \frac{a_l}{c_l} = 2\varepsilon T_{1app} \cdot e^{-\left(\frac{b_l}{T_{1a}}\right)} \cdot e^{-\left(\frac{t-b_l}{T_{1app}}\right)} \cdot \left( e^{\frac{LT}{T_{1app}}} - 1 \right) \quad (7)$$

100 By dividing Eq. (7) by Eq. (6), we get Eq. (8):

$$101 \quad \frac{\gamma_l}{\gamma_k} = \frac{e^{-\left(\frac{b_l}{T_{1a}}\right)} \cdot e^{-\left(\frac{t-b_l}{T_{1app}}\right)}}{e^{-\left(\frac{b_k}{T_{1a}}\right)} \cdot e^{-\left(\frac{t-b_k}{T_{1app}}\right)}} = e^{\left(\frac{1}{T_{1app}} - \frac{1}{T_{1a}}\right)\Delta} \quad (8)$$

102 Finally, we obtain  $\Delta$  using Eqs. (9)–(11):

103 
$$\Delta = \frac{1}{\frac{1}{T_{1app}} - \frac{1}{T_{1a}}} \cdot \log\left(\frac{\gamma_l}{\gamma_k}\right) \quad (9)$$

104 
$$\therefore \Delta = T' \cdot (\log(\gamma_l) - \log(\gamma_k)) \quad (10)$$

105 
$$\left(\frac{1}{T'} = \frac{1}{T_{1app}} - \frac{1}{T_{1a}} > 0\right) \quad (11)$$

106 According to Eq. (10),  $\Delta$  is in proportion to the difference of the logarithmic  
107 conversion of the ASL/SPECT ratios. Considering that the logarithmic function increases  
108 monotonically, the ASL/SPECT ratio and BAT have a positive relationship.

109

#### 110 *Delta ratio for visualization*

111 According to the theorems we have discussed above, we can define the difference in  
112 BAT ( $\Delta_n$ ) between a certain reference point ( $P_0(a_0, b_0, c_0)$ ) and any target points  
113 ( $P_n(a_n, b_n, c_n)$  ( $n = 1, 2, \dots, N$ )).

114 Here, we can define the delta ratio ( $\delta_n$ ) using Eq. (12):

115 
$$\delta_n = \frac{\gamma_n}{\gamma_0} \quad (12)$$

116 Using Eqs. (9) and (11), we get Eq. (13):

117 
$$\Delta_n = T' \cdot \log(\delta_n) \quad (13)$$

118  $\Delta_n$  monotonically increases as  $\delta_n$  increases. When applying the proposed concept in clinical  
119 practice,  $\delta_n$  is convenient for clinical visualization because of the simplicity of its calculation  
120 without logarithmic conversion.

121

#### 122 *Proof-of-concept study*

123 This retrospective study was approved by the Institutional Ethics Review Board of our  
124 hospital (2021-0520-4). The requirement for obtaining written informed consent was waived  
125 owing to the retrospective nature of the study. This study included all consecutive patients with  
126 ICA stenosis who were treated with carotid endarterectomy (CEA) from 2014 to 2019. Patients

127 with major ipsilateral infarction and/or > 50% contralateral ICA stenosis were excluded from  
128 the study. The data that support the findings of this study are available from the corresponding  
129 author upon request. This study adhered to the STROBE reporting guideline.

130

### 131 *ASL imaging*

132 MR imaging was performed before CEA using a 1.5T MR scanner (Signa HDxt; GE  
133 Healthcare, Tokyo, Japan). We acquired 3D pulsed continuous ASL (pCASL) images using the  
134 following parameters: repetition time, 4546 [ms]; echo time, 10.5 [ms]; field of view, 24.0  
135 [cm]; number of sampling points, 512; number of sections, 30; number of excitations, 2;  
136 bandwidth, 62.50 [Hz]; labeling time, 1.5 [s]. The datasets were obtained at a PLD of 2,525  
137 [ms].

138

### 139 *SPECT*

140 All patients underwent SPECT examinations of <sup>123</sup>I-iodoamphetamine  
141 autoradiography using Infinia Hawkeye 4 (GE Healthcare, Tokyo, Japan) to monitor pre- and  
142 postoperative CBF.

143

### 144 *Preprocessing*

145 We preprocessed the 3D-pCASL and SPECT datasets using the 3D stereotactic  
146 surface projection method (FALCON; Nihon-Medipysics, Tokyo, Japan), which fixes  
147 position alignment and sets ROIs based on vascular territories (12).

148

### 149 *Approximation of BAT*

150 First, we calculated the ASL/SPECT ratio at each voxel ( $\gamma_n$  ( $n = 1, 2, \dots, N$ )) using  
151 the preprocessed datasets of 3D-pCASL and SPECT. Second, we calculated the average of the

152 ASL/SPECT ratios in ipsilateral and contralateral middle cerebral artery (MCA) territories ( $\gamma_i$   
153 and  $\gamma_c$ ). Third, we calculated the delta ratio at each voxel ( $\delta_n$  ( $n = 1, 2, \dots, N$ )) by dividing  $\gamma_n$   
154 by  $\gamma_c$  and created preoperative maps of the delta ratio (Figure 2). Finally, we approximated the  
155 delay in the BAT ( $\Delta$ ) of the ipsilateral MCA territory compared with the contralateral one using  
156 Eqs. (9) and (11). We set T1a and T1app to 1.65 [s] and 1.2 [s], respectively (13,14).

157

### 158 *Correlation between preoperative and postoperative hemodynamics*

159 We investigated the influence of the preoperative hemodynamic status characterized  
160 by BAT on postoperative hemodynamics. We calculated the increased rate of CBF in  
161 ipsilateral MCA territory by comparing pre- and postoperative SPECT. We investigated the  
162 correlation between the delay of BAT and the increased rate of CBF by regression analysis.

163

### 164 *Statistical analysis*

165 The Mann–Whitney U test was used for parametric statistical analysis. Categorical  
166 variables were analyzed using Fisher’s exact test. The linear relationship between continuous  
167 variables was estimated using Pearson’s correlation coefficients. Statistical significance was  
168 set at  $p < 0.05$ . All statistical analyses were performed using the open-source statistical packages  
169 R and R commander (versions 4.0.3 and 2.7.1, respectively; R Foundation for Statistical  
170 Computing, Vienna, Austria).

171

## 172 **Results**

173 This study included 63 patients with carotid artery stenosis treated with CEA. The  
174 patients’ mean age was 69.7 years (standard deviation [SD], 6.3). Seven (14.3%) patients were  
175 female. The average of the ASL/SPECT ratios in the contralateral and ipsilateral MCA  
176 territories were 2.13 (SD, 0.42) and 2.30 (SD, 0.40), respectively. The average of the BAT



177 delay ( $\Delta$ ) in the ipsilateral MCA territory compared with the contralateral one was 0.144 [s]  
178 (SD, 0.167).

179

#### 180 *BAT delay and CBF increase*

181 Figure 2 shows the influence of the preoperative hemodynamic status characterized  
182 by BAT on postoperative CBF in the ipsilateral MCA territory. We found the positive  
183 correlation between the delay of BAT and the increased rate of CBF (Pearson's correlation  
184 coefficient, 0.444; 95% confidence interval, 0.220–0.623;  $p=0.000269$ ).

185 The mean increased rate of CBF in the ipsilateral MCA territory after CEA was 1.08  
186 (SD, 0.17). We considered that an increase of CBF over 1.25 times (mean plus SD) after CEA  
187 represented pathologic hyper-perfusion phenomenon. Four patients (6.3%) presented with  
188 hyper-perfusion phenomenon.

189

#### 190 *Visualization using delta ratio*

191 In four patients who presented with pathologic hyper-perfusion phenomenon, the  
192 delta ratio map indicated the region prone to the hyper-perfusion (Figure 3). On the other hand,  
193 the preoperative delta map was symmetrical in cases without a postoperative increase in CBF.

194

#### 195 **Discussion**

196 This study proposes a concept for approximating the BAT by integrating ASL and  
197 SPECT datasets. Theoretically, the difference in the logarithmic conversion of the ASL/SPECT  
198 ratios between the two ROIs is proportional to the difference in BAT. Simply put, the principle  
199 depends on the difference in the pharmacokinetics of the tracers in ASL and SPECT. The  
200 tracers in ASL are non-accumulative intra-arterial protons, whereas those in SPECT are  
201 accumulative radioisotopes generated via venous injection. The former enables the dynamic

202 measurement of CBF for several seconds, whereas the latter provides a static measurement of  
203 CBF. In other words, tissue magnetization in ASL is dependent on both CBF and BAT, whereas  
204 the gamma rays in SPECT are independent of BAT. Therefore, BAT can be approximated by  
205 substituting the CBF measured using SPECT in the equations describing the correlation  
206 between CBF and BAT in ASL. In addition to ASL and SPECT, this concept may be applicable  
207 to ASL and other modalities that measure CBF.

208         According to this theoretical proposition, we applied this concept in clinical practice. In  
209 patients with ICA stenosis, we calculated the delay of BAT in the ipsilateral MCA territory. In  
210 comparison of pre- and postoperative hemodynamics, we found a positive correlation between  
211 the preoperative BAT delay and the postoperative CBF increase. By visualizing the delta ratio,  
212 which has a positive correlation with BAT delay, we confirmed that the area with a high delta  
213 ratio coincided with the area with a high increase in CBF. The prolongation of BAT implies the  
214 dissipation of the kinetic energy of blood flow at the stenotic part and a decrease in both blood  
215 velocity and cerebral perfusion pressure in the downstream vessels. The decrease of cerebral  
216 perfusion pressure causes post-CEA hyper-perfusion syndrome (15). Thus, the results of this  
217 study suggest the ability of BAT to characterize hemodynamic impairment in patients with ICA  
218 stenosis.

219

## 220 *Limitations*

221         This study had some limitations. The proposed concept requires further validation; the  
222 measurement error should be evaluated by comparing the data acquired by conventional  
223 multi-PLD ASL. We consider that the BAT obtained using our proposed method might remain  
224 a matter of approximation rather than a realistic measurement.

225         The simplicity of the proposed method might increase the feasibility of approximating  
226 the BAT in patients with various types of steno-occlusive cerebrovascular diseases. However,

227 in patients with chronic cerebral ischemia, collateral blood supply frequently develops, and the  
228 BAT is remarkably prolonged. In such cases, the single-compartment theory is not applicable  
229 to describe tissue magnetization in 3D-pCASL imaging. Further research is required to  
230 determine the ASL/SPECT ratio in patients with remarkable prolongation of the BAT.

231

## 232 **Conclusion**

233 This study proposed a simple method for approximating BAT by integrating  
234 MR-ASL and SPECT. The results of this study demonstrate the feasibility of BAT,  
235 approximated using the proposed method, to characterize ischemic status in patients with  
236 chronic steno-occlusive cerebrovascular diseases. The proposed concept is also applicable to  
237 ASL and any modalities that measure CBF.

238

## 239 **Acknowledgments:**

240 We thank Dr. Nitin Shivappa for professional English language editing.

241

## 242 **Sources of Funding:**

243 None

244

## 245 **Disclosures:**

246 None

247

## 248 **References**

- 249 1. Alsop DC, Detr JA, Golay X, Günther M, Hendrikse J, Hernandez-Garcia L, Lu H,  
250 MacIntosh BJ, Parkes LM, Smits M, et al. Recommended implementation of arterial  
251 spin-labeled perfusion MRI for clinical applications: A consensus of the ISMRM

- 252 perfusion study group and the European consortium for ASL in dementia. *Magnetic*  
253 *Resonance in Medicine* 2015;73:102–116.
- 254 2. Paling D, Thade Petersen E, Tozer DJ, Altmann DR, Wheeler-Kingshott CA, Kapoor R,  
255 Miller DH, Golay X. Cerebral arterial bolus arrival time is prolonged in multiple sclerosis  
256 and associated with disability. *Journal of Cerebral Blood Flow and Metabolism*  
257 2014;34:34–42.
- 258 3. Fujiwara Y, Matsuda T, Kanamoto M, Tsuchida T, Tsuji K, Kosaka N, Adachi T, Kimura H.  
259 Comparison of long-labeled pseudo-continuous arterial spin labeling (ASL) features  
260 between young and elderly adults: special reference to parameter selection. *Acta*  
261 *Radiologica* 2017;58:84–90.
- 262 4. Fan H, Su P, Lin DDM, Goldberg EB, Walker A, Leigh R, Hillis AE, Lu H. Simultaneous  
263 hemodynamic and structural imaging of ischemic stroke with magnetic resonance  
264 fingerprinting arterial spin labeling. *Stroke* 2022;53:2016–2025.
- 265 5. Wang DJ, Alger JR, Qiao JX, Gunther M, Pope WB, Saver JL, Salamon N, Liebeskind DS,  
266 UCLA Stroke Investigators. Multi-delay multi-parametric arterial spin-labeled perfusion  
267 MRI in acute ischemic stroke - Comparison with dynamic susceptibility contrast enhanced  
268 perfusion imaging. *NeuroImage: Clinical* 2013;3:1–7.
- 269 6. MacIntosh BJ, Lindsay AC, Kylintireas I, Kuker W, Günther M, Robson MD, Kennedy J,  
270 Choudhury RP, Jezzard P. Multiple inflow pulsed arterial spin-labeling reveals delays in  
271 the arterial arrival time in minor stroke and transient ischemic attack. *AJNR. American*  
272 *Journal of Neuroradiology* 2010;31:1892–1894.
- 273 7. Wang R, Yu S, Alger JR, Zuo Z, Chen J, Wang R, An J, Wang B, Zhao J, Xue R, et al.  
274 Multi-delay arterial spin labeling perfusion MRI in Moyamoya disease--comparison with  
275 CT perfusion imaging. *European Radiology* 2014;24:1135–1144.

- 276 8. Dai W, Garcia D, de Bazelaire C, Alsop DC. Continuous flow-driven inversion for arterial  
277 spin labeling using pulsed radio frequency and gradient fields. *Magnetic Resonance in*  
278 *Medicine* 2008;60:1488–1497.
- 279 9. Dai W, Robson PM, Shankaranarayanan A, Alsop DC. Reduced resolution transit delay  
280 prescan for quantitative continuous arterial spin labeling perfusion imaging. *Magnetic*  
281 *Resonance in Medicine* 2012;67:1252–1265.
- 282 10. Tsujikawa T, Kimura H, Matsuda T, Fujiwara Y, Isozaki M, Kikuta K, Okazawa H.  
283 Arterial transit time mapping obtained by pulsed continuous 3D ASL imaging with  
284 multiple post-label delay acquisitions: comparative study with PET-CBF in patients with  
285 chronic occlusive cerebrovascular disease. *PLOS ONE* 2016;11:e0156005.
- 286 11. Garcia DM, Duhamel G, Alsop DC. Efficiency of inversion pulses for background  
287 suppressed arterial spin labeling. *Magnetic Resonance in Medicine* 2005;54:366–372.
- 288 12. Endo H, Fujimura M, Saito A, Endo T, Ootomo K, Tominaga T. Efficacy of arterial spin  
289 labeling magnetic resonance imaging with multiple post-labeling delays to predict  
290 postoperative cerebral hyperperfusion in carotid endarterectomy. *Neurological Research*  
291 2021;43:252–258.
- 292 13. Lu H, Clingman C, Golay X, van Zijl PC. Determining the longitudinal relaxation time  
293 (T1) of blood at 3.0 Tesla. *Magnetic Resonance in Medicine* 2004;52:679–682.
- 294 14. Cohen AD, Agarwal M, Jagra AS, Nencka AS, Meier TB, Lebel RM, McCrea MA, Wang  
295 Y. Longitudinal reproducibility of MR perfusion using 3D pseudocontinuous arterial spin  
296 labeling with hadamard-encoded multiple postlabeling delays. *Journal of Magnetic*  
297 *Resonance Imaging* 2020;51:1846–1853.
- 298 15. Bernstein M, Fleming JF, Deck JH. Cerebral hyperperfusion after carotid endarterectomy:  
299 a cause of cerebral hemorrhage. *Neurosurgery* 1984;15:50–56.

301 **Figures and figure legends**

302 **Figure 1.** Schemas showing the concept of the ASL/SPECT ratio.

303 (A) ASL images obtained at multiple PLDs (1.025–3.025 (s)) in a patient with left carotid  
304 artery stenosis. Note the asymmetry in signal intensity derived from the difference in CBF and  
305 BAT. Conversely, the temporal variation of the signal intensity under the constant CBF enables  
306 the approximation of BAT using multi-PLD ASL imaging. We compared SPECT and  
307 single-PLD ASL data to approximate BAT.

308 (B) Schematic graphs showing tissue magnetization in pCASL imaging. Consider two points:  
309  $P_1$  at the ipsilateral side (red) and  $P_0$  at the contralateral side (blue) shown in Figure 1A. The  
310 exponential curves show the tissue magnetization ( $\Delta M/M_0$ ) with time after the start of labeling  
311 ( $t = 0$ ) at  $P_0$  (blue line) and  $P_1$  (red line), based on a single-compartment model. The tissue  
312 magnetization at a certain PLD is assumed to be  $a_0$  at  $P_0$  and  $a_1$  at  $P_1$ , and the BAT at  $P_0$  and  $P_1$   
313 is  $b_0$  and  $b_1$ , respectively. The subtraction of  $b_0$  from  $b_1$  leaves the delay of BAT at  $P_1$  ( $\Delta$  (s)).  
314 When SPECT provides CBF at  $P_0$  and  $P_1$  as  $c_0$  and  $c_1$ , we can calculate the ASL/SPECT ratios  
315 as  $a_0/c_0$  at  $P_0$  and  $a_1/c_1$  at  $P_1$ , respectively. Under the condition that the PLD is longer than the  
316 sum of BAT and LT, we can approximate  $\Delta$  from the logarithmic conversion of the  
317 ASL/SPECT ratios at  $P_0$  and  $P_1$ .

318 BAT: bolus arrival time

319 CBF: cerebral blood flow

320 LT: labeling time

321 pCASL: pulsed continuous arterial spin labeling

322 PLD: post-labeling delay

323 SPECT: single-photon emission computed tomography

324

325 **Figure 2.** Preoperative BAT delay and postoperative CBF increase

326 The graph shows a positive correlation between the preoperative delay of BAT and the  
327 postoperative increase of CBF in the ipsilateral MCA territory. We identified three cases with  
328 prolongation of the BAT delay over 0.4 [s] and an increased rate of CBF over 1.25 (cases 1-3).  
329 (see also Figure 3)

330

331 **Figure 3.** Visualization using delta ratio

332 (A) Preoperative SPECT. Affected side is also shown by L or R for left or right, respectively.

333 (B) Postoperative SPECT

334 (C) Preoperative delta map. Note that the area with postoperative hyper-perfusion phenomenon  
335 presents with a high delta ratio (case 1-3; white arrows). The preoperative delta map was  
336 symmetrical in a case without postoperative hyper-perfusion phenomenon (case 4). The range  
337 of the color bar is as follows: from 15 to 45 (mL/100 mg/min) for SPECT and from 0 to 3.5 for  
338 the delta map.

339

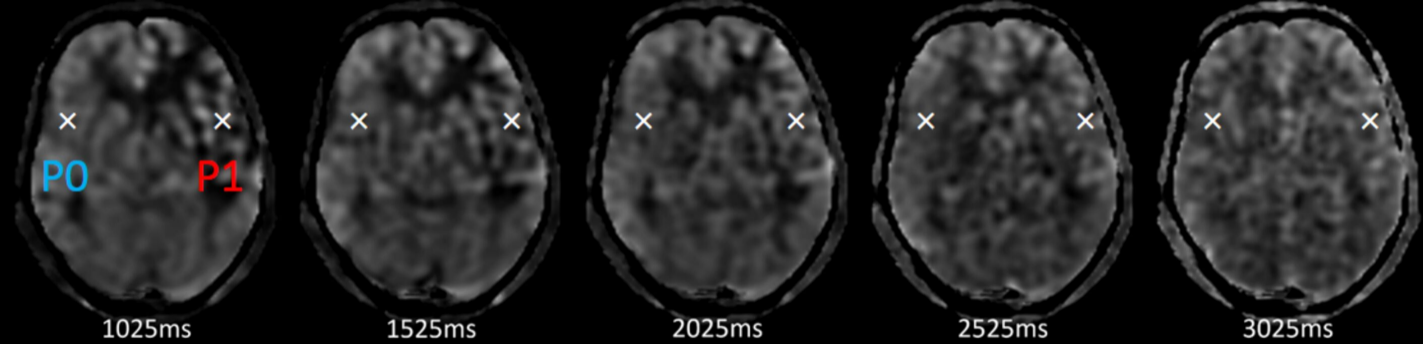



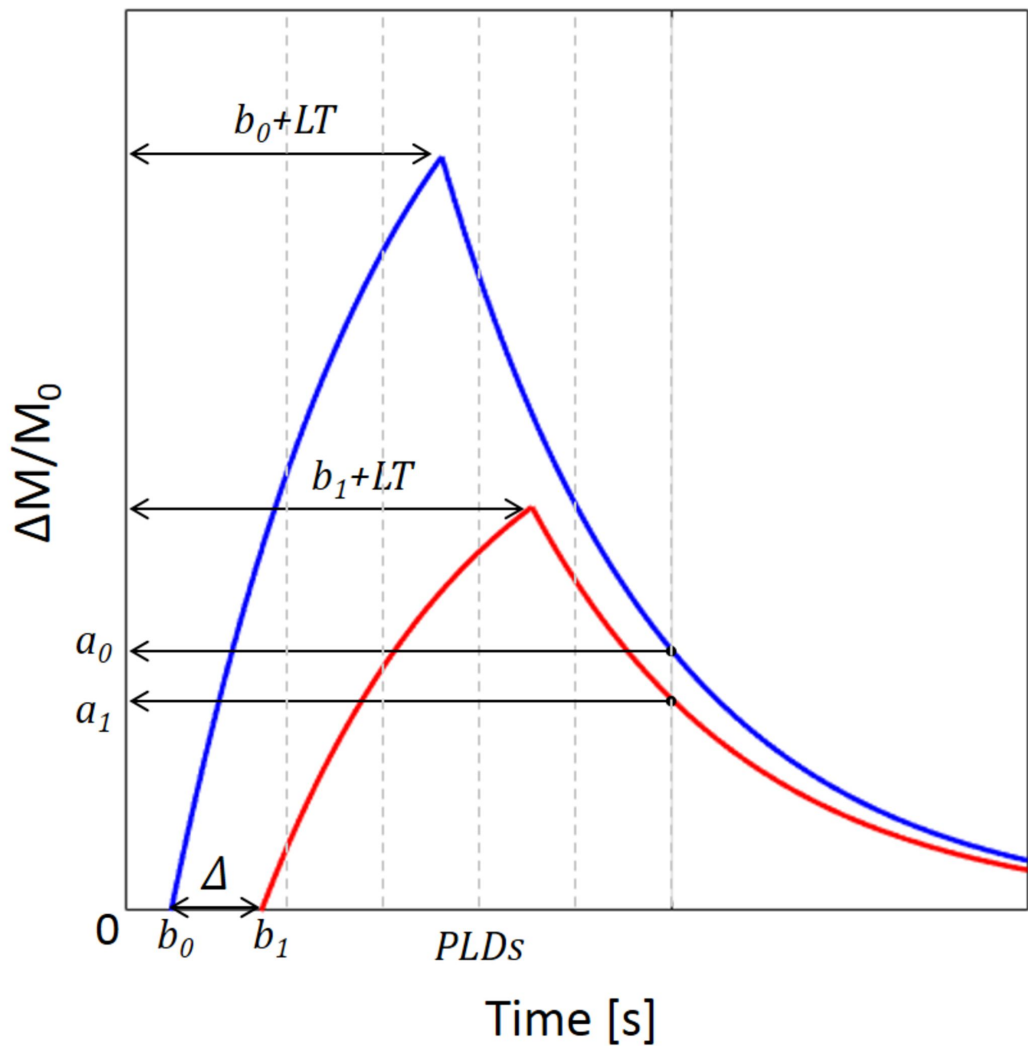

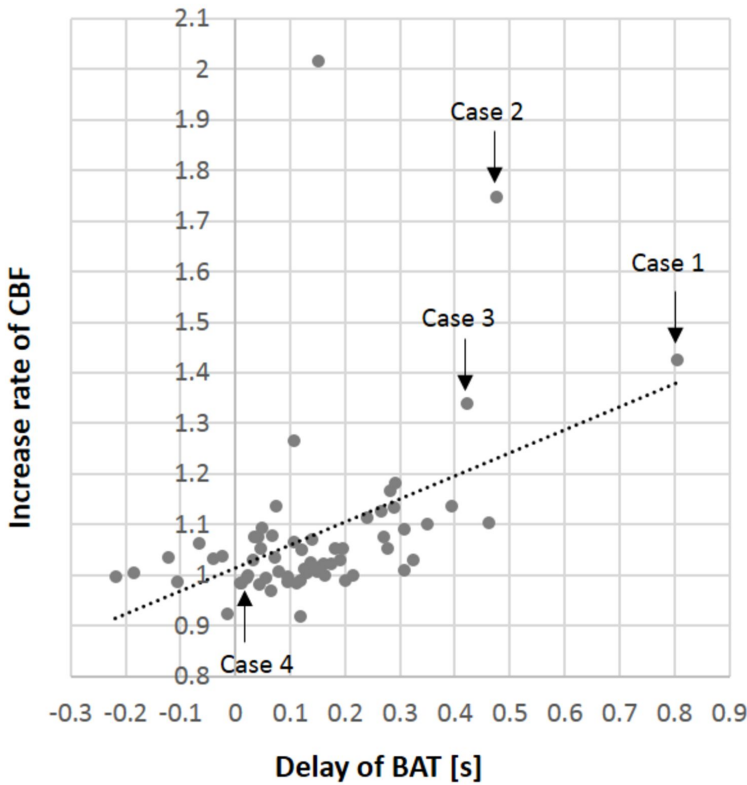

**A** **B** **C**  
**Pre-SPECT** **Post-SPECT** **Pre- $\delta$  map**

**Case 1**

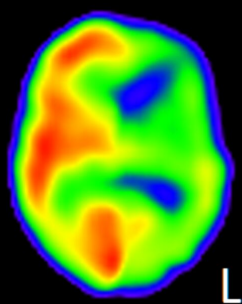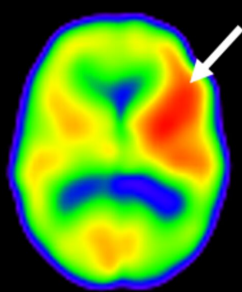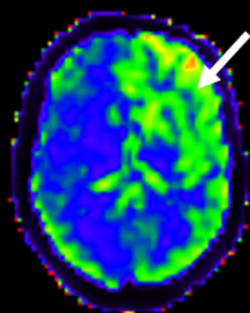

**Case 2**

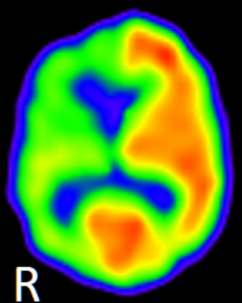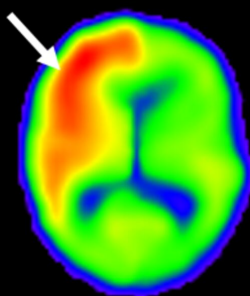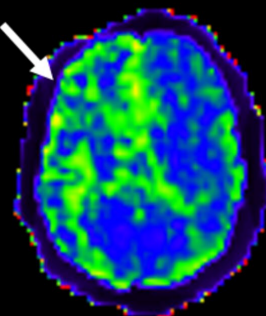

**Case 3**

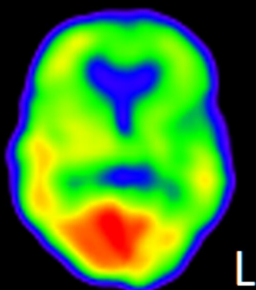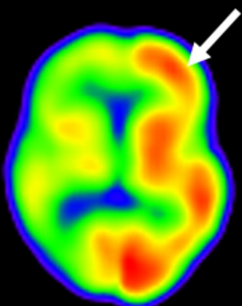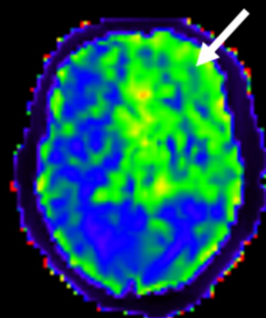

**Case 4**

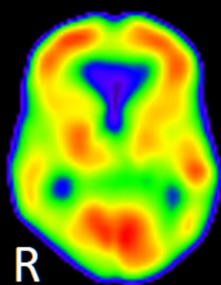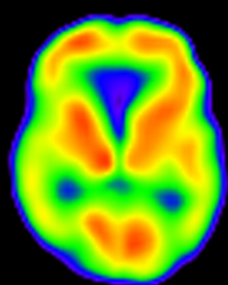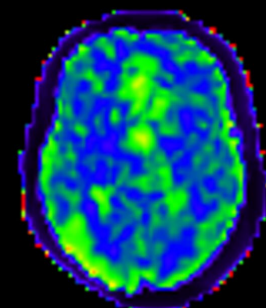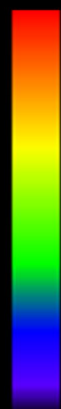

Source: https://www.medrxiv.org/content/10.1101/2023.07.10.23292486.full.pdf
